# Supplementary material
Source: MDPI journal article supplement (https://www.mdpi.com/2073-4433/9/12/468)
Supplement: s1 [file s1 › atmosphere-372029-supplementary.pdf]

Supplemental Material of  
Long-term wintertime trend of zonally  
asymmetric ozone in boreal extratropics during  
1979–2016

A. Schneidereit and D. H. W. Peters

## 1 Supplemental Figures

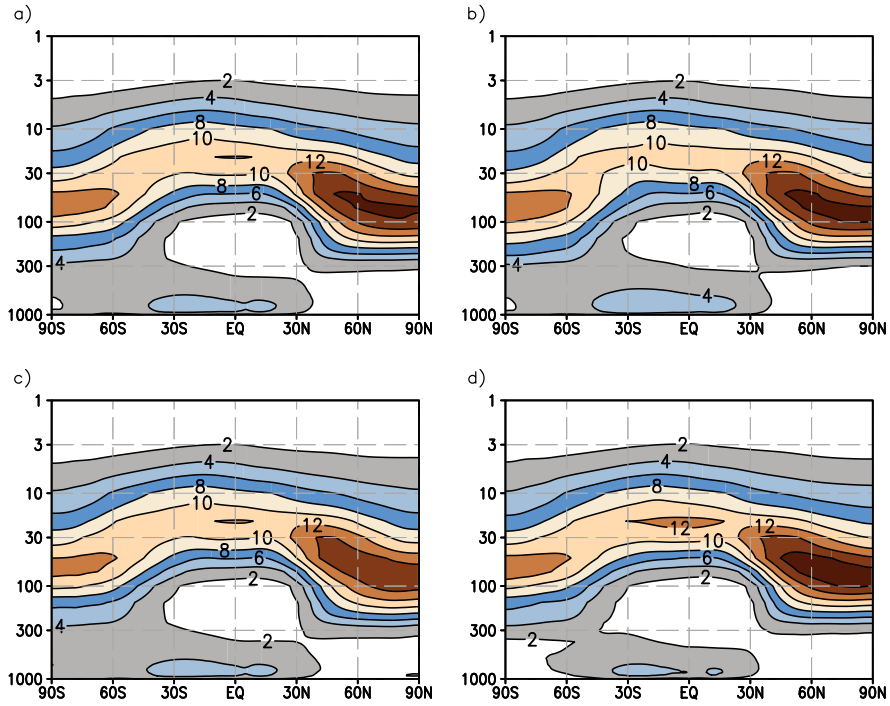

Figure S1: Latitude-height distribution of zonal mean ozone in [DU/km] for (a) 1980–2016, (b) 1980–1994, (c) 1991–2005, and (d) 2002–2016 for January using ERA-Interim.

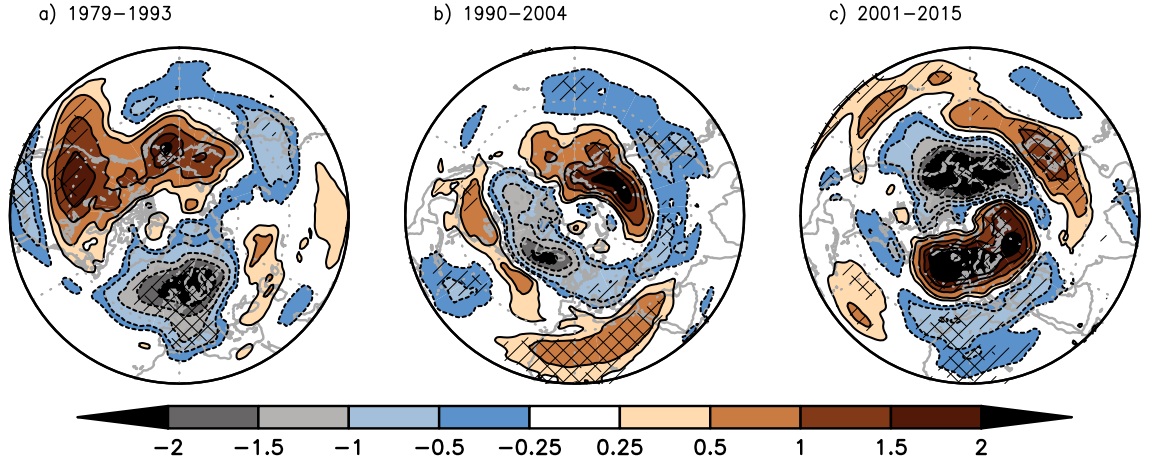

Figure S2: Secular trends (linear regression coefficient) of ZATO in [DU/year] for December for the three stages (a) 1979–1993, (b) 1990–2004, and (c) 2001–2015. Cross (single) hatched regions mark statistically significant trends on a 95% (90%) confidence level.

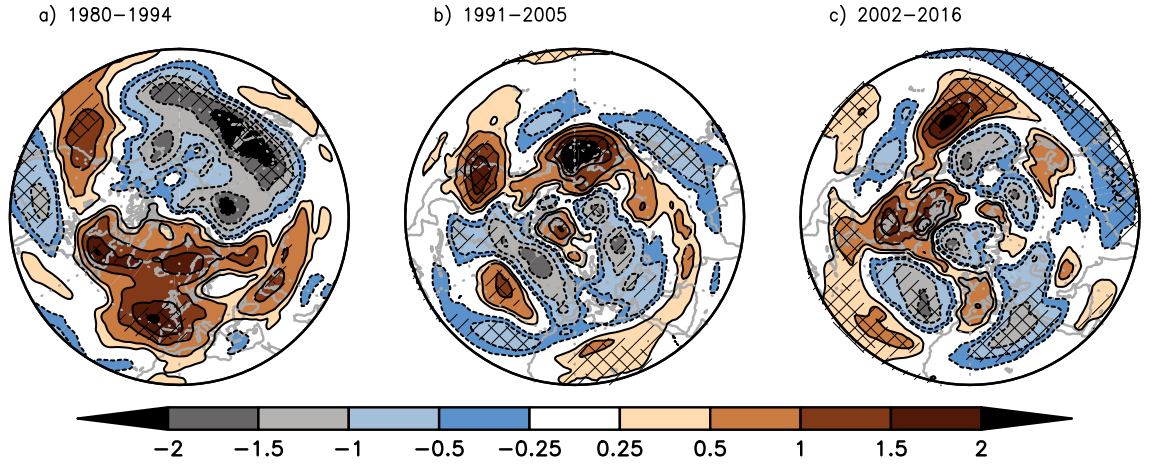

Figure S3: Secular trends (linear regression coefficient) of ZATO in [DU/year] for February for the three stages (a) 1980–1994, (b) 1991–2005, and (c) 2002–2016. Cross (single) hatched regions mark statistically significant trends on a 95% (90%) confidence level.

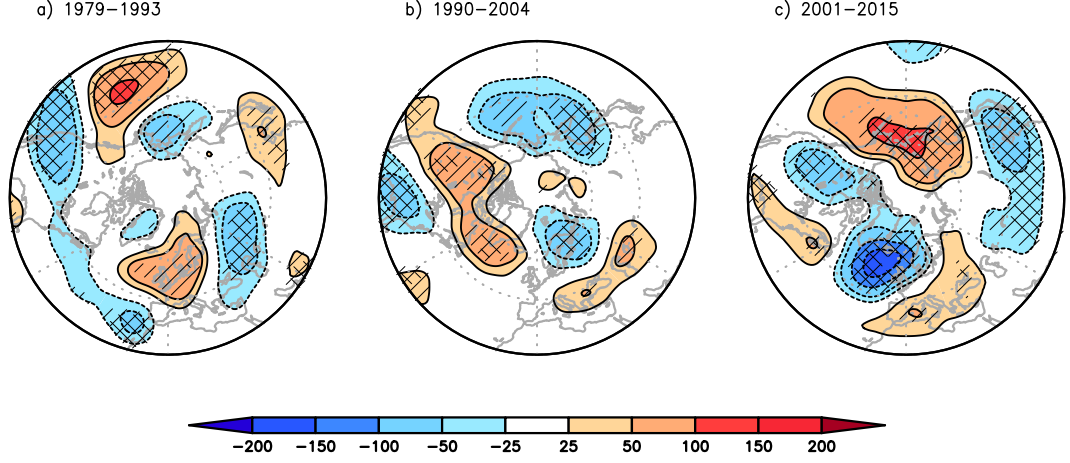

Figure S4: Secular trends (linear regression coefficient) of the geopotential disturbance at 300 hPa in  $[\text{m}^2 \text{ s}^{-2}/\text{year}]$  for the three stages: (a) 1980–1994, (b) 1991–2005, and (c) 2002–2016 for December ERA-Interim. Cross (single) hatched regions mark statistically significant trends with a 95% (90%) confidence level.

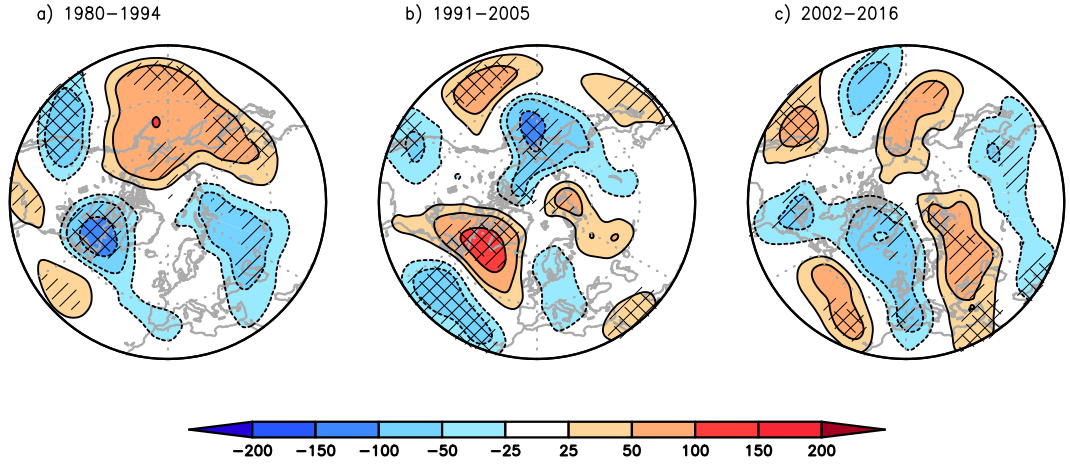

Figure S5: Secular trends (linear regression coefficient) of the geopotential disturbance at 300 hPa in  $[\text{m}^2 \text{ s}^{-2}/\text{year}]$  for the three stages: (a) 1980–1994, (b) 1991–2005, and (c) 2002–2016 for February ERA-Interim. Cross (single) hatched regions mark statistically significant trends with a 95% (90%) confidence level.

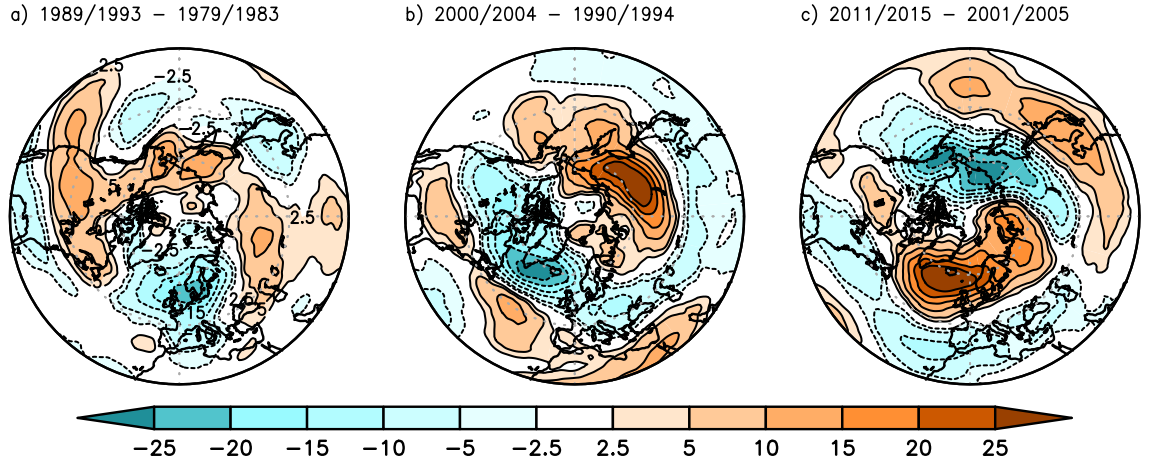

Figure S6: Trend-like pattern determined by the difference of 5-year means of ZATO for December in [DU/decade]. The three stages are described by the following difference (a) 1989/1993 - 1979/1983, (b) 2000/2004 - 1990/1994, and (c) 2011/2015 - 2001/2005.

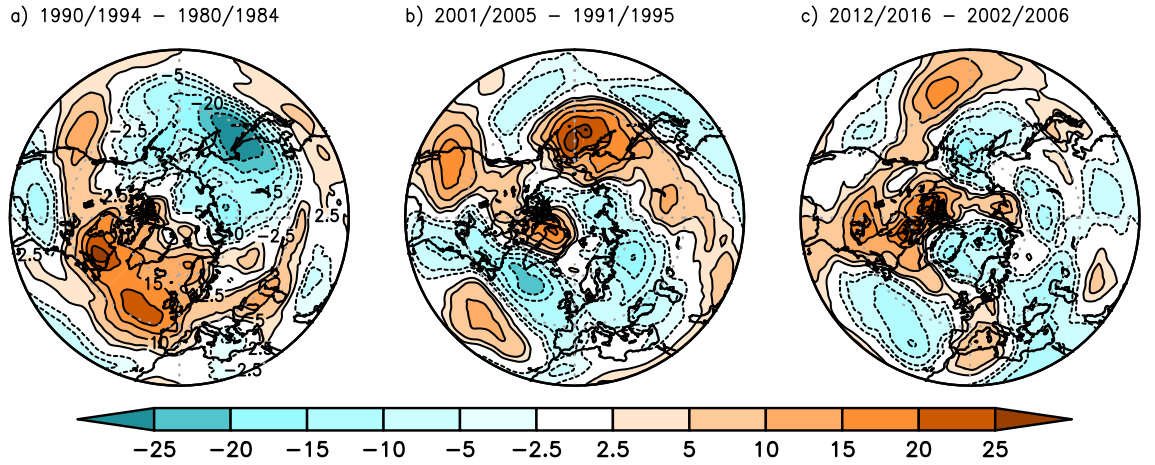

Figure S7: Trend-like pattern determined by the difference of 5-year means of ZATO for February in [DU/decade]. The three stages are described by the following difference (a) 1990/1994 - 1980/1984, (b) 2001/2005 - 1991/1995, and (c) 2012/2016 - 2002/2006.

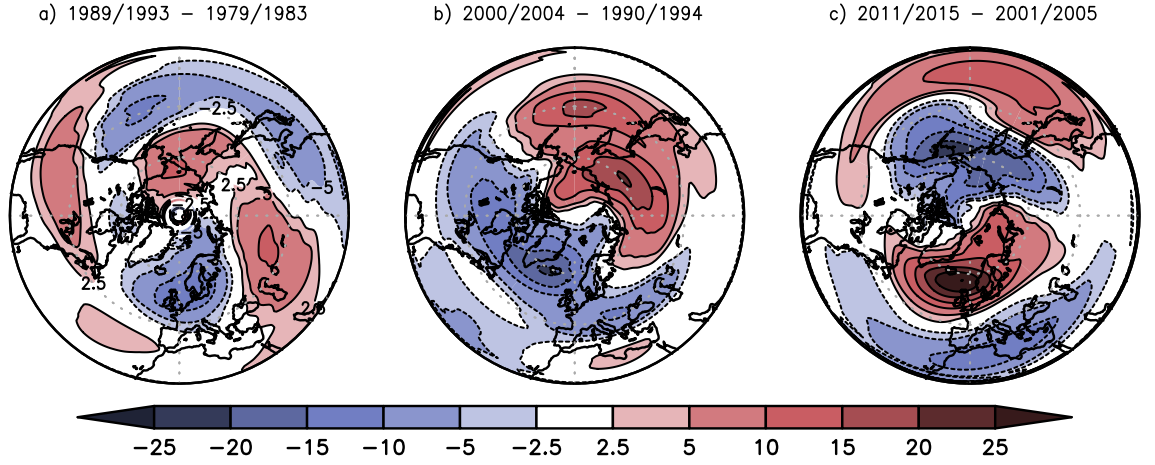

Figure S8: Trend-like pattern determined by the difference of 5-year means of ZATO for December but using the linear transport model result with contributions of wave 1–4.

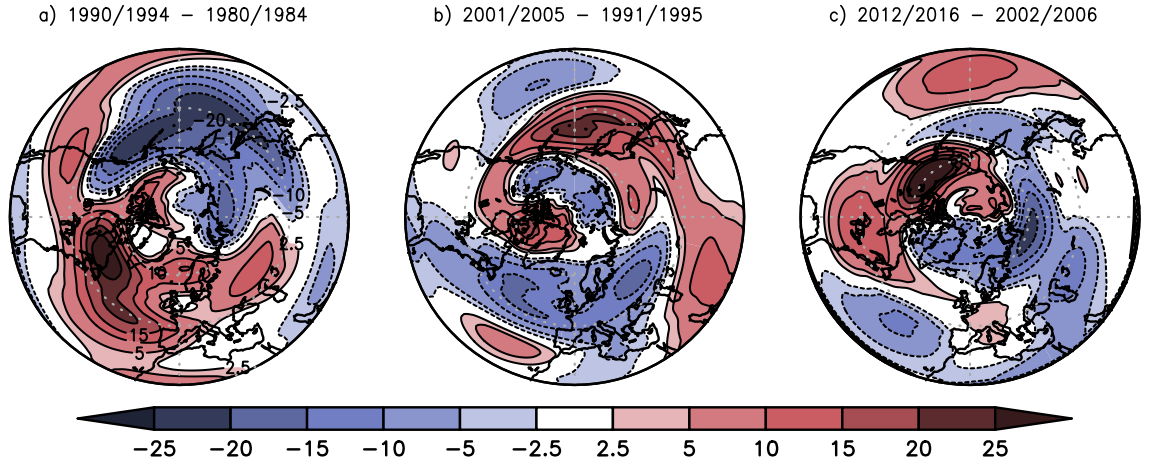

Figure S9: Trend-like pattern determined by the difference of 5-year means of ZATO for February but using the linear transport model result with contributions of wave 1–4.
